# Supplementary material for: Dietary supplementation of pterostilbene, a major component in small berries, prevents alcohol-induced liver injury associated with lipid accumulation and inflammation
Source: Royal Society of Chemistry journal article supplement (doi:10.1039/d4fo03898c), 2024-01-01
Supplement: d4fo03898c1.pdf [file d4fo03898c1.pdf]

## Supplementary Data

Dietary supplementation of pterostilbene, the major component from small berries,  
prevents alcohol induced liver injury associated with lipid accumulation and  
inflammation

Jia-Yi Dou<sup>a, 1</sup>, Sai-Hu Liu<sup>a, 1</sup>, Jia Guo<sup>a</sup>, Chen-Yu Wang<sup>a</sup>, Xu Dai<sup>a</sup>, Li-Hua Lian<sup>a</sup>,  
Zhen-Yu Cui<sup>a,b,\*</sup>, Ji-Xing Nan<sup>a,\*</sup>, Yan-Ling Wu<sup>a,\*</sup>

<sup>a</sup> Key Laboratory for Traditional Chinese Korean Medicine Research (State Ethnic Affairs), College of Pharmacy, Yanbian University, Yanji, Jilin Province 133002, China

<sup>b</sup> *Jilin Vocational and Technical College, Yanji, Jilin Province 133002, China*

\*Corresponding authors at: Key Laboratory for Traditional Chinese Korean Medicine Research (State Ethnic Affairs), College of Pharmacy, Yanbian University, Yanji, Jilin Province 133002, China

E-mail addresses: [cuizhenyu@ybu.edu.cn](mailto:cuizhenyu@ybu.edu.cn) (Z.-Y. Cui); [jxnan@ybu.edu.cn](mailto:jxnan@ybu.edu.cn) (J.-X. Nan); [ylwu@ybu.edu.cn](mailto:ylwu@ybu.edu.cn) (Y.-L. Wu).

**A**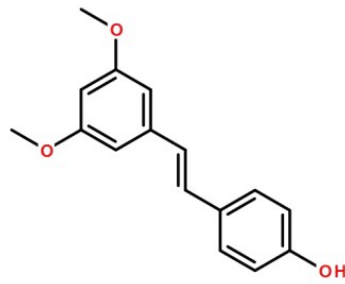

Chemical structure of pterostilbene (PTE)

**B**

## Acute ethanol model

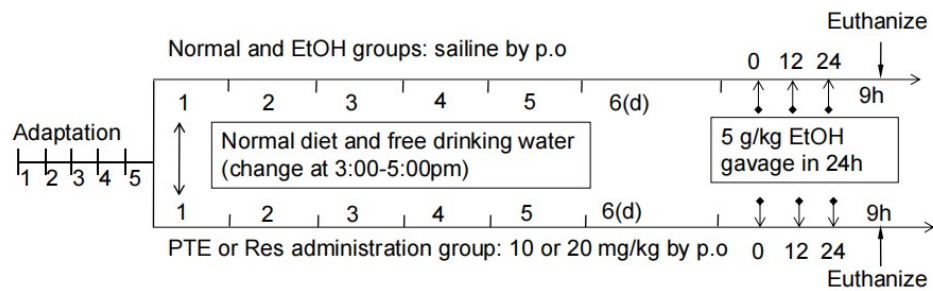**C**

## Chronic ethanol-binge feeding model

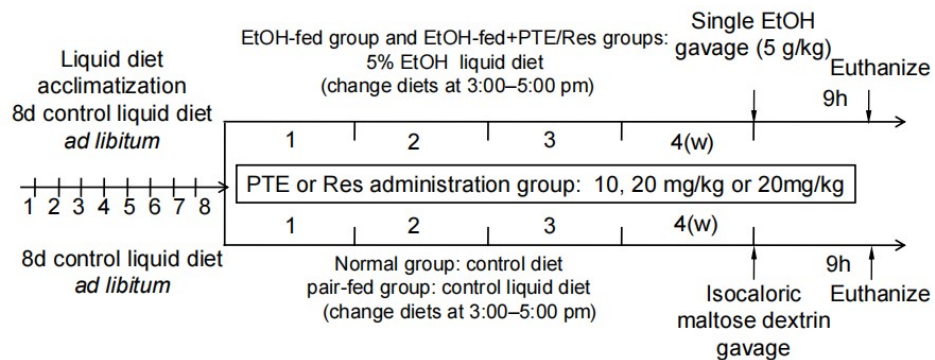

**Fig. S1** (A) Chemical structure of PTE. (B) Animal experimental scheme of acute ethanol model. (C) Animal experimental scheme of chronic ethanol-binge feeding model.
